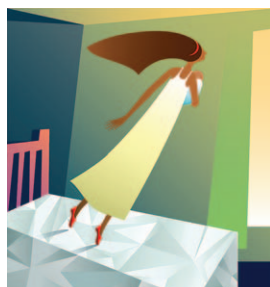

## ON THE COVER:

In this issue of ANESTHESIOLOGY, research teams describe the results of two studies that provide important new information toward understanding the development of chronic pain after childbirth. Persistent pain after childbirth may be less common than after other types of surgery (James P. Rathmell, M.D., selected the cover image and wrote the “On the Cover” text):

- Flood and Wong: Chronic Pain Secondary to Childbirth: Does It Exist?, p. 16
- Eisenach *et al.*: Resolution of Pain after Childbirth, p. 143

## ◇ THIS MONTH IN ANESTHESIOLOGY

9A

## ◆ EDITORIAL VIEWS

- CME** **Anesthesiology and the Acute Respiratory Distress Syndrome: An Ounce of Prevention Is Worth a Pound of Cure** 1  
*Daryl J. Kor and Daniel Talmor*
- Dopamine-enhancing Medications to Accelerate Emergence from General Anesthesia** 5  
*Helene Benveniste and Nora D. Volkow*
- Fibrinogen Concentrate and Allogeneic Blood Transfusion in High-risk Surgery** 7  
*Nauder Faraday*
- Clinical Studies of Erythrocyte Outcomes and Mortality: Size Really Counts** 10  
*Jerrold H. Levy and Marie E. Steiner; for the Transfusion Medicine and Hemostasis Clinical Trials Network*
- Consciousness, Anesthesia, and the Thalamocortical System** 13  
*George A. Mashour and Michael T. Alkire*
- Chronic Pain Secondary to Childbirth: Does It Exist?** 16  
*Pamela Flood and Cynthia A. Wong*

## ■ PERIOPERATIVE MEDICINE

- CME** **◆ Preoperative and Intraoperative Predictors of Postoperative Acute Respiratory Distress Syndrome in a General Surgical Population** 19  
*James M. Blum, Michael J Stentz, Ronald Dechert, Elizabeth Jewell, Milo Engoren, Andrew L. Rosenberg, and Pauline K. Park*

Acute respiratory distress syndrome is rare after surgical procedures. After propensity analysis, risk factors for syndrome development include American Society of Anesthesiologists physical status, renal failure, chronic obstructive pulmonary disease, drive pressure, and intraoperative blood transfusion.

|                                          |                                    |
|------------------------------------------|------------------------------------|
| ◇ Refers to This Month in Anesthesiology | 🌐 See Supplemental Digital Content |
| ◆ Refers to Editorial Views              | <b>CME</b> CME Article             |

- ◆ **Activation of D1 Dopamine Receptors Induces Emergence from Isoflurane General Anesthesia** 30  
*Norman E. Taylor, Jessica J. Chemali, Emery N. Brown, and Ken Solt*  
 In adult rats, the D1 dopamine receptor agonist chloro-APB decreases time to emergence from isoflurane anesthesia and restores righting during continuous isoflurane anesthesia. Selective activation of D1 receptors is sufficient to induce emergence from general anesthesia.
- ◆◆ **Effects of Fibrinogen Concentrate as First-line Therapy during Major Aortic Replacement Surgery: A Randomized, Placebo-controlled Trial** 40  
*Niels Rahe-Meyer, Cristina Solomon, Alexander Hanke, Dirk S. Schmidt, Dietrich Knoerzer, Gerald Hochleitner, Benny Sørensen, Christian Hagl, and Maximilian Pichlmaier*  
 Targeted, first-line hemostatic therapy with fibrinogen concentrate significantly reduced the transfusion of allogeneic blood products in adult patients undergoing elective thoracic or thoracoabdominal aortic replacement surgery involving cardiopulmonary bypass.
- ◆ **Erythrocyte Storage Duration Is Not Associated with Increased Mortality in Noncardiac Surgical Patients: A Retrospective Analysis of 6,994 Patients** 51  
*Leif Saager, Alparslan Turan, Jarrod E. Dalton, Priscilla I. Figueroa, Daniel I. Sessler, and Andrea Kurz*  
 In this retrospective study of 6,994 noncardiac surgical patients, the authors did not find an association between erythrocyte storage duration and postoperative mortality.
- ◆🌐 **Differential Effects of Deep Sedation with Propofol on the Specific and Nonspecific Thalamocortical Systems: A Functional Magnetic Resonance Imaging Study** 59  
*Xiaolin Liu, Kathryn K. Lauer, B. Douglas Ward, Shi-Jiang Li, and Anthony G. Hudetz*  
 Deep sedation with propofol preferentially inhibits nonspecific *versus* specific thalamocortical functional connectivity, suggesting loss of higher integration of auditory information. *SUPPLEMENTAL DIGITAL CONTENT IS AVAILABLE IN THE TEXT*
- Influence of Epidural Mixture and Surgery on Bladder Function after Open Renal Surgery: A Randomized Clinical Trial** 70  
*Patrick Y. Wuethrich, Tobias Metzger, Livio Mordasini, Thomas M. Kessler, Michele Curatolo, and Fiona C. Burkhard*  
 Thoracic epidural analgesia with bupivacaine, with or without fentanyl and independent of surgery, leads to detrusor underactivity and clinically relevant postvoid residual.
- Development and Validation of a Perioperative Satisfaction Questionnaire in Regional Anesthesia** 78  
*Axel Maurice-Szamburski, Nicolas Bruder, Anderson Loundou, Xavier Capdevila, and Pascal Auquier*  
 Multidimensional perioperative satisfaction questionnaire in the framework of regional anesthesia: development, validation, and new findings.
- Analysis of the Posterior Ramus of the Lumbar Spinal Nerve: The Structure of the Posterior Ramus of the Spinal Nerve** 88  
*Toshiyuki Saito, Hanno Steinke, Takayoshi Miyaki, Shiro Nawa, Kanae Umemoto, Kunihisa Miyakawa, Norimitsu Wakao, Ken Asamoto, and Takashi Nakano*  
 The three-dimensional anatomy of the human posterior ramus of the spinal nerve was analyzed by classical dissection, laser scanning, and with specimens rendered transparent.
- 🌐 **Helium Induces Preconditioning in Human Endothelium *In Vivo*** 95  
*Kirsten F. Smit, Gezina T. M. L. Oei, Daniel Brevoord, Erik S. Stroes, Rienk Nieuwland, Wolfgang S. Schlack, Markus W. Hollmann, Nina C. Weber, and Benedikt Preckel*  
 Helium induces early and late preconditioning in human endothelium in a model of forearm ischemia–reperfusion using venous occlusion plethysmography in healthy volunteers. *SUPPLEMENTAL DIGITAL CONTENT IS AVAILABLE IN THE TEXT*

**Coadministration of Hydrogen Gas as Part of the Carrier Gas Mixture Suppresses Neuronal Apoptosis and Subsequent Behavioral Deficits Caused by Neonatal Exposure to Sevoflurane in Mice** 105

*Ryuji Yonamine, Yasushi Satoh, Mitsuyoshi Kodama, Yoshiyuki Araki, and Tomiei Kazama*

Although neonatal exposure to sevoflurane causes widespread neuronal apoptosis and subsequent impairments of cognitive functions in mice, coadministration of hydrogen as part of the carrier gas mixture suppresses them through an antioxidant effect.

**Effects of Recruitment Maneuver and Positive End-expiratory Pressure on Respiratory Mechanics and Transpulmonary Pressure during Laparoscopic Surgery** 114

*Gilda Cinnella, Salvatore Grasso, Savino Spadaro, Michela Rausedo, Lucia Mirabella, Potito Salatto, Antonella De Capraris, Luigi Nappi, Pantaleo Greco, and Michele Dambrosio*

Recruitment maneuver increases transpulmonary pressure, improves chest wall compliance, and induces alveolar recruitment in patients undergoing laparoscopic surgery.

■ **CRITICAL CARE MEDICINE**

**The *NFKB1* Promoter Polymorphism (–94ins/delATTG) Alters Nuclear Translocation of NF-κB1 in Monocytes after Lipopolysaccharide Stimulation and Is Associated with Increased Mortality in Sepsis** 123

*Michael Adamzik, Simon Schäfer, Ulrich H. Frey, Arne Becker, Maximiliane Kreuzer, Sandra Winning, Stilla Frede, Jörg Steinmann, Joachim Fandrey, Kai Zacharowski, Winfried Siffert, Jürgen Peters, and Matthias Hartmann*

Survival in severe sepsis may be associated with genetic variations. The *NFKB1* promoter polymorphism (–94ins/delATTG) alters nuclear translocation of NF-κB1 in monocytes after lipopolysaccharide stimulation and is associated with increased mortality in sepsis.

**Regional Sympathetic Blockade Attenuates Activation of Intestinal Macrophages and Reduces Gut Barrier Failure** 134

*Jörn Schäper, Antje Wagner, Fabian Enigk, Bernhard Brell, Shaaban A. Mousa, Helmut Habazettl, and Michael Schäfer*

Thoracic epidural anesthesia decreased endotoxin-induced epithelial permeability of the gut. This is likely due to an inhibition of intestinal macrophage infiltration with less production of nitric oxide and less nitrosative tissue injury.

■ **PAIN MEDICINE**

◆◆ **Resolution of Pain after Childbirth** 143

*James C. Eisenach, Peter Pan, Richard M. Smiley, Patricia Lavand'homme, Ruth Landau, and Timothy T. Houle*

Chronic pain is reported to occur in 5 to 20% of women after cesarean delivery. Predictors of pain at 2 months after childbirth and the incidence of pain at 6 and 12 months were determined by interviewing 1,228 women within 36 h of delivery, then contacting 937 of them 2 months after delivery and again at 6 and 12 months if they had pain. Only 1.8% of the women who had pain that began at the time of delivery had pain 6 months later and only 0.3% of women with pain beginning at the time of delivery had pain at 12 months. Although the degree of tissue trauma and history of chronic pain are risk factors for pain 2 months after other surgery, they were not important to pain 2 months after cesarean section or vaginal delivery.

◆ **Reversal of Peripheral Nerve Injury-induced Hypersensitivity in the Postpartum Period: Role of Spinal Oxytocin** 152

*Silvia Gutierrez, Baogang Liu, Ken-ichiro Hayashida, Timothy T. Houle, and James C. Eisenach*

The postpartum period rather than pregnancy protects against chronic hypersensitivity from peripheral nerve injury and this protection may reflect sustained oxytocin signaling in the central nervous system during this period.

**Rufinamide Attenuates Mechanical Allodynia in a Model of Neuropathic Pain in the Mouse and Stabilizes Voltage-gated Sodium Channel Inactivated State** 160

*Marc R. Suter, Guylène Kirschmann, Cedric J. Laedermann, Hugues Abriel, and Isabelle Decosterd*

The anti-epileptic drug rufinamide alleviates mechanical allodynia in a neuropathic pain model with less side-effect than amitriptyline, one of the first-line treatments for neuropathic pain. Rufinamide stabilizes sodium channels in their inactivated state.

- Relief of Hypersensitivity after Nerve Injury from Systemic Donepezil Involves Spinal Cholinergic and  $\gamma$ -Aminobutyric Acid Mechanisms** 173  
*Masafumi Kimura, Ken-ichiro Hayashida, James C. Eisenach, Shigeru Saito, and Hideaki Obata*

Systemic donepezil reduces hypersensitivity after nerve injury in rats by increasing acetylcholine in the spinal cord, which in turn results in  $\gamma$ -aminobutyric acid release. Both acetylcholine and  $\gamma$ -aminobutyric acid contribute to the antihypersensitivity from donepezil.

#### ■ CLASSIC PAPERS REVISITED

- The Thermoregulation Story** 181  
*Daniel I. Sessler*

This article is a revisiting of original material published as: Sessler DI, Olofsson CI, Rubinstein EH, Beebe JJ: The thermoregulatory threshold in humans during halothane anesthesia. *Anesthesiology* 1988; 68:836-42.

#### ■ EDUCATION

### IMAGES IN ANESTHESIOLOGY

- Reversible Anterior Spinal Artery Syndrome during Celiac Plexus Block** 187  
*Foad Elahi, Willis Y. Wu, Daniel Callahan, Avinash K. Bhandary, Barry C. Beutler, and Cesar A. Lassalle*

- Radial Artery Pseudoaneurysm: A Rare Complication with Serious Risk to Life and Limb** 188  
*Angela T. Truong and Dilip R. Thakar*

### ANESTHESIA LITERATURE REVIEW 189

#### CLINICAL CONCEPTS AND COMMENTARY

- Capnography Outside the Operating Rooms** 192  
*Bhavani Shankar Kodali*

There is an increasing awareness in the value of capnography to monitor airway integrity and ventilation outside of the operating rooms and intensive care units. Its utility in guiding chest compression during cardiopulmonary resuscitation has been recognized.

#### REVIEW ARTICLE

- Acquired Neuromuscular Weakness and Early Mobilization in the Intensive Care Unit** 202  
*Angela K. M. Lipshutz and Michael A. Gropper*

The authors outline the physiological consequences of bedrest, the etiologies and pathophysiology of neuromuscular weakness in the intensive care unit, and the safety, feasibility, and benefits of early mobilization in critical illness.

#### MIND TO MIND

- All in a Day's Work** 216  
*Nishant Kumar*

- Anesthesiology to Rescue** 218  
*Mirsad Serdarevic*

#### CASE REPORT

-  **Transesophageal Echocardiography: A Novel Technique for Guidance and Placement of an Epidural Catheter in Infants** 219  
*Kenichi Ueda, Bridget E. Shields, Timothy J. Brennan*

SUPPLEMENTAL DIGITAL CONTENT IS AVAILABLE IN THE TEXT

## ■ CORRESPONDENCE

- Preoperative Anemia Considerations** 223  
*Enrique Vázquez Alonso and Martin Rodriguez Banqueri*
- In Reply**  
*Lawrence Tim Goodnough and Aryeh Shander*
- Patient Blood Management: Erratum** 224
- 
- Is “Triple Low” of Low Blood Pressure, Low Bispectral Index, and Low Minimum Alveolar Concentration of Volatile Anesthesia an Independent Predictor for Postoperative Mortality?** 225  
*Hai Yu and Bin Liu*
- Concentration of Precious Sleep: Piloting Survival or Attending Death?**  
*Christopher Lotz and Franz Kehl*
- In Reply**  
*Daniel I. Sessler, Scott D. Kelley, and Scott Greenwald*
- 
- Airway Anatomy of AirSim High-fidelity Simulator** 228  
*Srdjan Jelačić, Victor Ghioni, and Andrew Bowdle*
- In Reply**  
*Karl Schebesta and Oliver Kimberger*
- 
- Monozygotic Twins: Identical in Name Only** 230  
*Ray Greek and Mark J. Rice*
- In Reply**  
*Martin S. Angst and J. David Clark*

## CONTENTS

### ■ ANESTHESIOLOGY REFLECTIONS FROM THE WOOD LIBRARY-MUSEUM

- Hayes Generator No. 3 Finds a Home for the Holidays** 15  
*George S. Bause*
- Tonalgia, “the Most Satisfactory Local Anesthetic”** 39  
*George S. Bause*
- After Dosing and Dozing: A Photoportrait of James Matthews Duncan** 94  
*George S. Bause*

### ■ REVIEWS OF EDUCATIONAL MATERIAL 232

### ■ ANNOUNCEMENTS 234

### ■ CAREERS & EVENTS 29A

## INSTRUCTIONS FOR AUTHORS

The most recently updated version of the Instructions for Authors is available at [www.anesthesiology.org](http://www.anesthesiology.org). Please refer to the Instructions for the preparation of any material for submission to ANESTHESIOLOGY.

Manuscripts submitted for consideration for publication must be submitted in electronic format. The preferred method is via the Journal's Web site (<http://www.anesthesiology.org>). Detailed directions for submissions and the most recent version of the Instructions for Authors can be found on the Web site (<http://www.anesthesiology.org>). Books and educational materials should be sent to Michael J. Avram, Ph.D., Department of Anesthesiology, Northwestern University Feinberg School of Medicine, Ward Memorial Building, Room 13-199, 303 East Chicago Avenue, Chicago, IL 60611-3008. Requests for permission to duplicate materials published in ANESTHESIOLOGY should be submitted in electronic format, to the Permissions Department ([journalpermissions@lww.com](mailto:journalpermissions@lww.com)). All articles accepted for publication are done so with the understanding that they are contributed exclusively to this Journal and become the property of the American Society of Anesthesiologists, Inc. Statements or opinions expressed in the Journal reflect the views of the author(s) and do not represent official policy of the American Society of Anesthesiologists unless so stated. Advertising and related correspondence should be addressed to Advertising Manager, ANESTHESIOLOGY, Lippincott Williams & Wilkins, Two Commerce Square, 2001 Market Street, Philadelphia, Pennsylvania 19103 (Web site: <http://www.lww.com/advertisingratecards/>). Publication of an advertisement in ANESTHESIOLOGY does not constitute endorsement by the Society or Lippincott Williams & Wilkins, Inc. of the product or service described therein or of any representations made by the advertiser with respect to the product or service.
